# Supplementary material
Source: publisher figshare collection journal article supplement (https://gsajournals.figshare.com/ndownloader/files/13687652)
Supplement: Supplementary file 1 [file 13687652]

**Table S15:** Inhibitorphenotypes of isogenic pAG36::*WHI2*- vs. pAG36-containing strain pairs

| Strain | *WHI2* genotype | YPE | EtBr | Ery | Spi | Ant | Myx | Oli |
| --- | --- | --- | --- | --- | --- | --- | --- | --- |
| YJM189 | + | = | = | = | = | = | = | = |
| YJM193 | + | = | = | = | = | = | = | > |
| YJM244 | - | = | = | = | = | = | > | > |
| YJM248 | - | = | = | = | = | > | = | = |
| YJM271 | + | = | = | = | = | = | = | = |
| YJM428 | + | = | = | = | = | > | = | = |
| YJM450 | **+** | **=** | **=** | **=** | **=** | **=** | **=** | **=** |
| YJM689 | + | = | = | = | = | = | = | = |
| YJM1083 | + | = | = | = | = | = | = | = |
| YJM1199 | + | > | NA | NA | NA | NA | NA | NA |
| YJM1242 | - | = | > | > | = | > | > | > |
| YJM1244 | - | = | > | > | = | = | > | = |
| YJM1326 | + | = | = | = | = | = | = | = |
| YJM1332 | + | = | = | = | = | > | = | = |
| YJM1336 | + | = | = | = | = | = | = | = |
| YJM1342 | - | = | = | = | = | = | > | = |
| YJM1355 | - | = | = | = | = | = | > | = |
| YJM1399 | + | = | = | = | = | = | = | = |
| YJM1479 | - | = | = | = | = | = | = | = |
| YJM1628 | + | = | = | = | = | = | = | = |
